# Supplementary material for: Design Data and Finite Element Analysis of 3D Printed Poly(ε-Caprolactone)-Based Lattice Scaffolds: Influence of Type of Unit Cell, Porosity, and Nozzle Diameter on the Mechanical Behavior
Source: MDPI journal article supplement (doi:10.3390/eng3010002), 2021-12-25
Supplement: s1 [file s1]

*Supplementary Information for*

# Design Data and Finite Element Analysis of 3D Printed Poly( $\epsilon$ -Caprolactone)-Based Lattice Scaffolds: Influence of Type of Unit Cell, Porosity, and Nozzle Diameter on the Mechanical Behavior

Riccardo Sala, Stefano Regondi and Raffaele Pugliese \*

NeMO Lab, ASST Niguarda Cà Granda Hospital, Milan, Italy; riccardo.sala@nemolab.it (R.S.); stefano.regondi@nemolab.it (S.R.)

\* Correspondence: raffaele.pugliese@nemolab.it

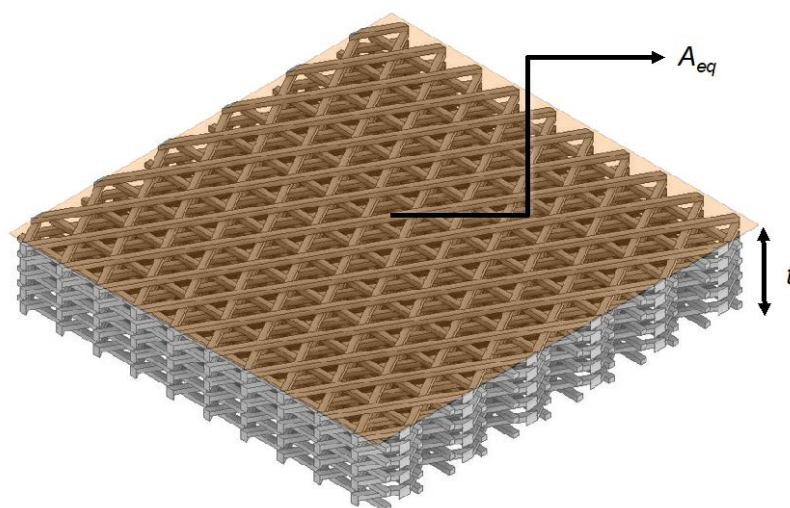

**Figure S1.** Explanation picture about the quantities reported in Equations (2) and (3).

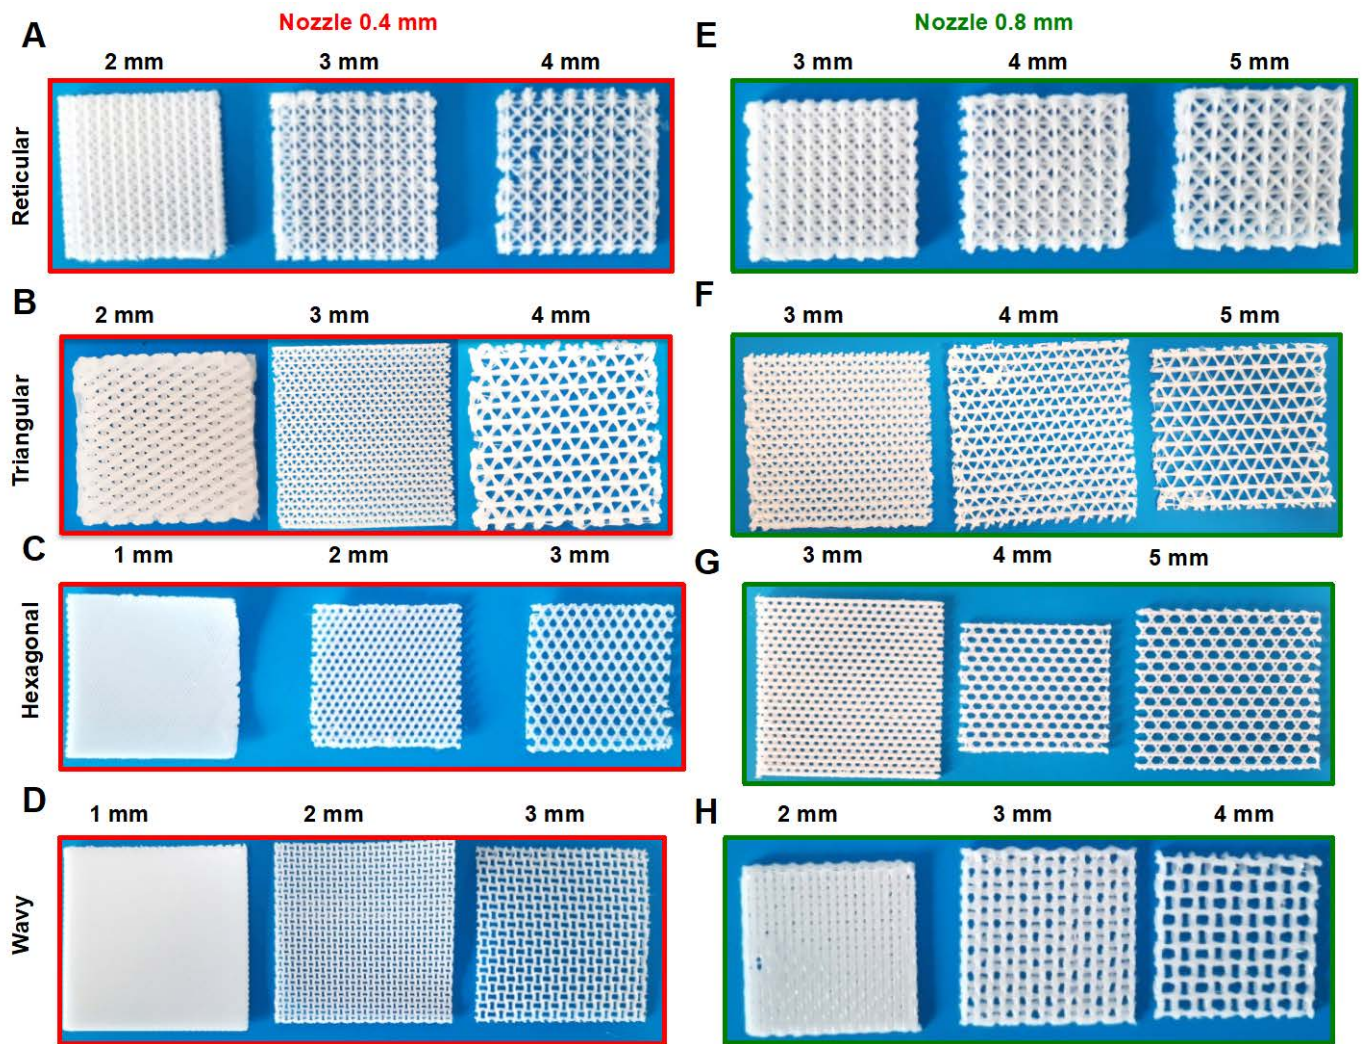

Figure S2. 3D printed PCL scaffolds with different geometries and nozzle diameters.

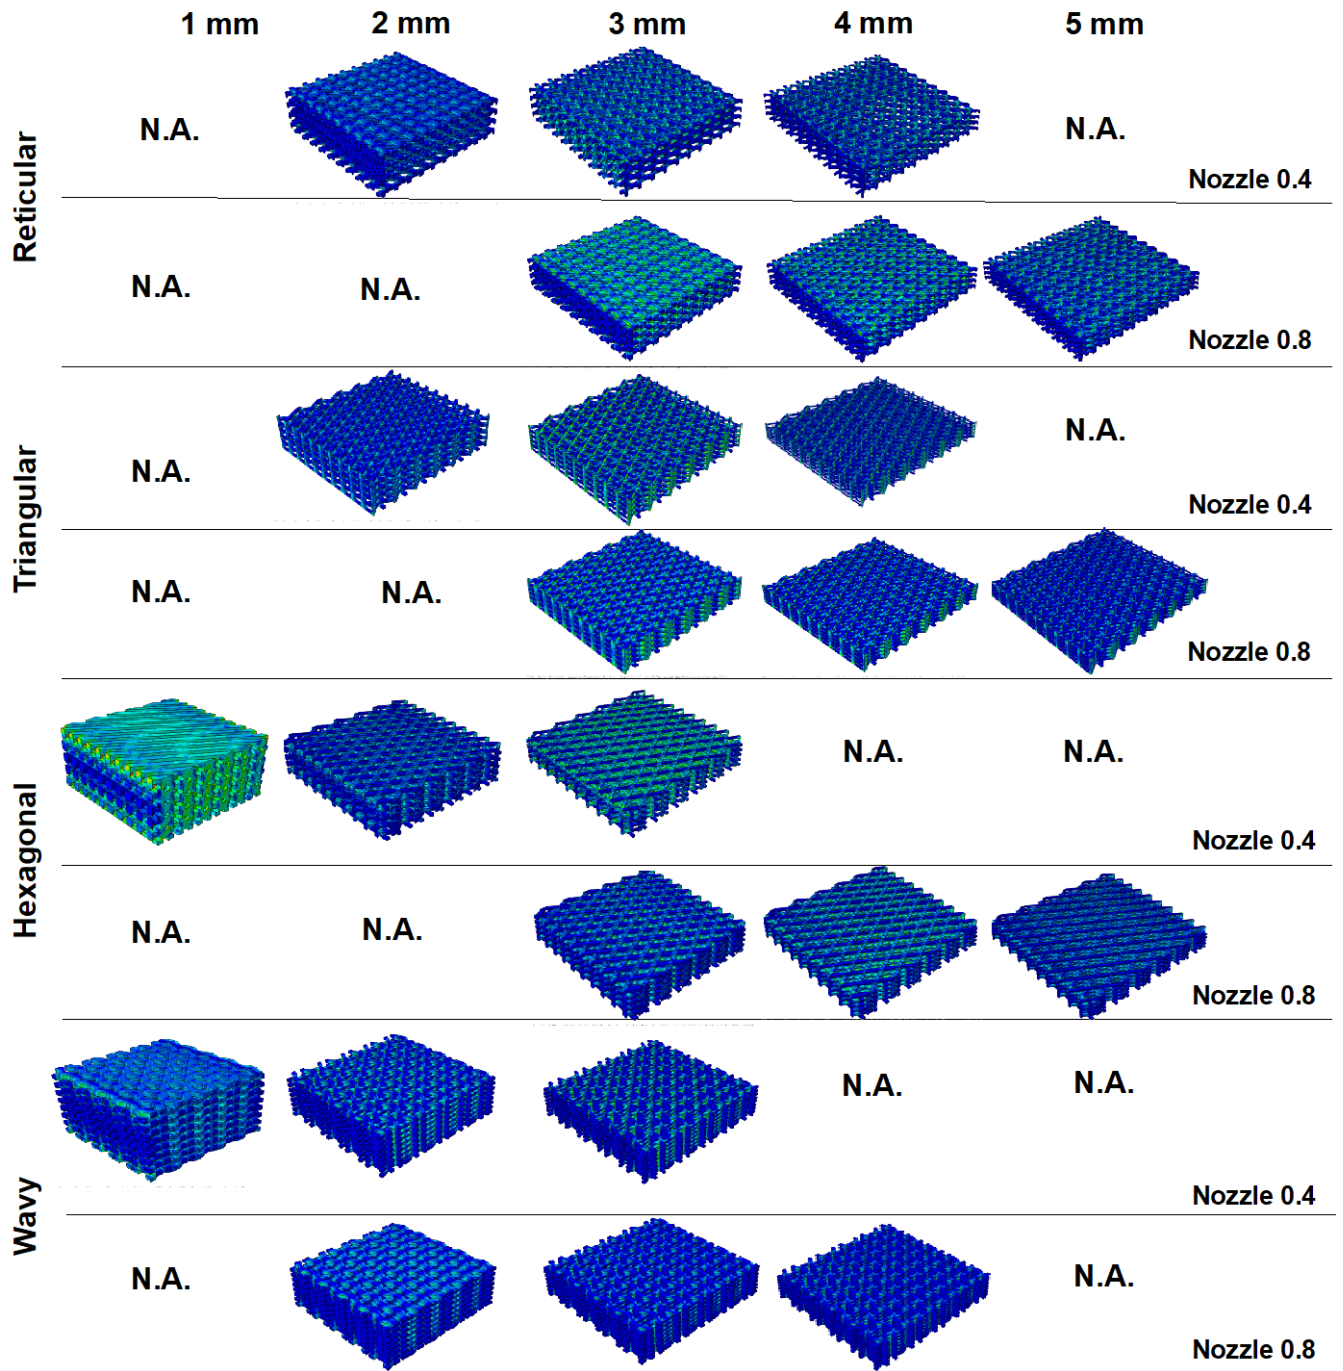

Figure S3. The Von-Mises stress-strain distributions in the simulated shear test by FEM in the  $y$ -directions.

**Table S1.** Comparison of shear moduli in the linear model of four types of scaffolds with different nozzle diameter and unit cell sizes.

| Shear Modulus       | $G_{zx}$        | $G_{zy}$ | $G_{zx}$         | $G_{zy}$ | $G_{zx}$        | $G_{zy}$ | $G_{zx}$   | $G_{zy}$ |
|---------------------|-----------------|----------|------------------|----------|-----------------|----------|------------|----------|
| Unit Cell Size (mm) | Reticular (MPa) |          | Triangular (MPa) |          | Hexagonal (MPa) |          | Wavy (MPa) |          |
| 1 (nozzle 0.4)      | -               | -        | -                | -        | 29.43           | 29.96    | 20.48      | 20.48    |
| 2 (nozzle 0.4)      | 5.52            | 5.52     | 3.16             | 3.24     | 3.30            | 3.35     | 2.59       | 2.59     |
| 3 (nozzle 0.4)      | 1.32            | 1.32     | 0.83             | 0.85     | 0.56            | 0.58     | 0.74       | 0.74     |
| 4 (nozzle 0.4)      | 0.47            | 0.47     | 0.34             | 0.35     | -               | -        | -          | -        |
| 5 (nozzle 0.4)      | -               | -        | -                | -        | -               | -        | -          | -        |
| 1 (nozzle 0.8)      | -               | -        | -                | -        | -               | -        | -          | -        |
| 2 (nozzle 0.8)      | -               | -        | -                | -        | -               | -        | 11.68      | 11.68    |
| 3 (nozzle 0.8)      | 5.69            | 5.69     | 2.98             | 3.03     | 2.92            | 2.97     | 2.81       | 2.81     |
| 4 (nozzle 0.8)      | 1.92            | 1.92     | 1.19             | 1.20     | 0.75            | 0.77     | 1.16       | 1.16     |
| 5 (nozzle 0.8)      | 0.99            | 0.99     | 0.62             | 0.63     | 0.26            | 0.27     | -          | -        |
